# Supplementary material
Source: PubMed Central journal article supplement (PMC7089663)
Supplement: awaa029_supplementary_data.pdf [file awaa029_supplementary_data.pdf]

**Supplementary table for Lewis-Smith D et al. Early-onset genetic epilepsies reaching adult clinics. Brain 2020. <https://doi.org/10.1093/brain/awaa029>**

**Estimates of the number of children with genetic epilepsy onset before 3 years of age who will require adult neurology care**

| Syndrome and gene                                                                | n in Symonds et al. (2019) |                            |                                                                         | Evidence for prognostication                                                                                                                                                                                                                                                                                                                                                                                                                | Estimate of active cases at transition |
|----------------------------------------------------------------------------------|----------------------------|----------------------------|-------------------------------------------------------------------------|---------------------------------------------------------------------------------------------------------------------------------------------------------------------------------------------------------------------------------------------------------------------------------------------------------------------------------------------------------------------------------------------------------------------------------------------|----------------------------------------|
|                                                                                  | Total                      | Therapy-resistant seizures | Neurodevelopment                                                        |                                                                                                                                                                                                                                                                                                                                                                                                                                             |                                        |
| Self-limited infantile epilepsy<br><i>PRRT2</i>                                  | 15                         | 0                          | Moderate delay = 1<br>Mild delay = 1<br>Normal = 12<br>Missing data = 1 | Typical <i>PRRT2</i> -related self-limited infantile epilepsy remits in early childhood in 89-98%, about a quarter of those with self-limited epilepsy in early childhood may develop paroxysmal kinesigenic dyskinesia as juveniles or adolescents, which commonly improves during adulthood (Ebrahimi-Fakhari et al., 2015).                                                                                                              | 0-3                                    |
| Dravet syndrome<br><i>SCN1A</i>                                                  | 11                         | 11                         | Moderate delay = 6<br>Mild delay = 3<br>Normal = 2                      | The childhood mortality of <i>SCN1A</i> -positive Dravet syndrome is 16%-21% and whilst seizures may become less frequent or even enter remission, adults continue to require anti-epileptic treatment (Jansen et al., 2006; Akiyama et al., 2010; Catarino et al., 2011; Genton et al., 2011; Cooper et al., 2016).                                                                                                                        | 9-11                                   |
| GLUT1-deficiency syndrome<br><i>SLC2A1</i>                                       | 7                          | 2<br>Missing data = 2      | Mild delay = 3<br>Normal = 4                                            | A third of people with seizures due to Glut1-deficiency syndrome continue to experience seizures in adulthood and many develop a movement disorder (Leen et al., 2014).                                                                                                                                                                                                                                                                     | 1-7                                    |
| Self-limited neonatal epilepsy<br><i>KCNQ2</i>                                   | 6                          | 0                          | Normal = 6                                                              | These are self-limited in early childhood but 18% have seizures in adolescence or adulthood (Miceli et al., 2010; Grinton et al., 2015).                                                                                                                                                                                                                                                                                                    | 0-1                                    |
| Early infantile-onset developmental and epileptic encephalopathy<br><i>CDKL5</i> | 4<br>(1 male)              | 4                          | Severe delay = 3<br>Moderate delay = 1                                  | A quarter of girls presenting with <i>CDKL5</i> -related epilepsy before 3 years old may enter treatment-free remission and another third may enter remission on continuing treatment (Bahi-Buisson et al., 2008), the remainder are likely to have seizures refractory to current treatments (Muller et al., 2016). Boys may have a more severe phenotype than girls (Liang et al., 2019).                                                 | 3-4                                    |
| Unclassified epilepsy<br><i>SLC6A1</i>                                           | 3                          | 2                          | Profound delay = 1<br>Moderate delay = 1                                | A significant minority of people with epilepsy and developmental delay beginning before 3 years of age and due to <i>SLC6A1</i> variants may enter remission, but many relapse and the majority continue to require antiepileptic medication (Carvill et al., 2015c; Johannesen et al., 2018a).                                                                                                                                             | 2-3                                    |
| <i>PCHD19</i> -related epilepsy<br><i>PCHD19</i>                                 | 3                          | 3                          | Profound delay = 1<br>Moderate delay = 1<br>Normal = 1                  | <i>PCHD19</i> -related seizures become less frequent at puberty as behavioural and psychiatric features become more prominent (Trivisano et al., 2018). Beyond 15 years old 80% may be seizure-free for two years but relapse after long seizure-free intervals is reported (van Harssel et al., 2013) and many patients require follow up into adulthood because of seizures, continuing anti-epileptic medication and suspected seizures. | 1-3                                    |
| Focal epilepsy<br><i>DEPDC5</i>                                                  | 3                          | 1                          | Normal = 3                                                              | <i>DEPDC5</i> -related epilepsies are usually active and require treatment into adulthood, although half of those amenable to surgery may achieve remission through this (Baldassari et al., 2019).                                                                                                                                                                                                                                         | 2-3                                    |
| Self-limited familial neonatal epilepsy<br><i>KCNQ3</i>                          | 2                          | 0                          | Normal = 2                                                              | These are self-limited in early childhood (Miceli et al., 2014).                                                                                                                                                                                                                                                                                                                                                                            | 0-0                                    |
| <i>KCNQ2</i> -related encephalopathy<br><i>KCNQ2</i>                             | 2                          | 1                          | Profound delay = 1<br>Moderate delay = 1                                | Seizures of <i>KCNQ2</i> -related epilepsy usually remit in childhood even if encephalopathy continues; both adults reported had become seizure-free for several years albeit with one remaining on anti-epileptic medication (Weckhuysen et al., 2013).                                                                                                                                                                                    | 0-2                                    |
| Self-limited infantile epilepsy<br><i>KCNQ2</i>                                  | 1                          | 0                          | Normal                                                                  | These are self-limited in early childhood but 10-18% have seizures in adolescence or adulthood (Miceli et al., 2010; Grinton et al., 2015).                                                                                                                                                                                                                                                                                                 | 0-0                                    |
| Genetic epilepsy with febrile seizures plus<br><i>SCN1A</i>                      | 1                          | 1                          | Normal                                                                  | This participant had treatment-resistant febrile seizures plus with focal seizures. Most people with febrile seizures plus and focal seizures have active epilepsy into adulthood (Zhang et al., 2017) and whilst many people become seizure-free, roughly half remain on medication (de Lange et al., 2019).                                                                                                                               | 0-1                                    |
| Absences with eyelid                                                             | 1                          | 1                          | Moderate delay                                                          | People with onset of absences with eyelid myoclonia prior to 3 years of age are likely to remain refractory to antiepileptic                                                                                                                                                                                                                                                                                                                | 1-1                                    |

|                                                                                   |   |   |                |                                                                                                                                                                                                                                                                                                                                                                                                                                                                                                                                                                                                                                            |     |
|-----------------------------------------------------------------------------------|---|---|----------------|--------------------------------------------------------------------------------------------------------------------------------------------------------------------------------------------------------------------------------------------------------------------------------------------------------------------------------------------------------------------------------------------------------------------------------------------------------------------------------------------------------------------------------------------------------------------------------------------------------------------------------------------|-----|
| myoclonia<br><i>CHD2</i>                                                          |   |   |                | medications and to develop intellectual disability (Caraballo <i>et al.</i> , 2009). Only a quarter of the few reported individuals with <i>CHD2</i> -related epilepsy and treatment outcomes have obtained seizure-freedom and these required continuing medication (Carvill <i>et al.</i> , 2015a).                                                                                                                                                                                                                                                                                                                                      |     |
| Early infantile-onset developmental and epileptic encephalopathy<br><i>SCN8A</i>  | 1 | 1 | Profound delay | <i>SCN8A</i> -related seizures with developmental delay usually require continuing antiepileptic therapy and mortality is estimated at 5%, mostly in early childhood (Johannesen <i>et al.</i> , 2018b). Seizures may come less frequent in adolescence with sodium channel multiple medications (Gardella <i>et al.</i> , 2018) and seizure-freedom is possible from the third decade (Larsen <i>et al.</i> , 2015).                                                                                                                                                                                                                      | 1-1 |
| Early infantile-onset developmental and epileptic encephalopathy<br><i>STXBPI</i> | 1 | 0 | Severe delay   | A third of people with <i>STXBPI</i> -related epilepsy become seizure-free but late relapse has been observed and neurological follow up may be required for movement disorders (Stamberger <i>et al.</i> , 2016).                                                                                                                                                                                                                                                                                                                                                                                                                         | 0-1 |
| Epilepsy of infancy with migrating focal seizures<br><i>GABRA1</i>                | 1 | 1 | Profound delay | Epilepsy of infancy with migrating focal seizures has a poor prognosis with continuing seizures, intellectual disability and risk of premature death in childhood (McTague <i>et al.</i> , 2013; McTague <i>et al.</i> , 2016), and <i>GABRA1</i> -associated epileptic encephalopathies have been reported reaching adulthood with refractory seizures (Johannesen <i>et al.</i> , 2016). However, the association between <i>GABRA1</i> and this syndrome is yet to be described in sufficient people to inform prognostication in greater detail.                                                                                       | 1-1 |
| Epilepsy with myoclonic-atonic seizures<br><i>SLC6A1</i>                          | 1 | 0 | Moderate delay | A significant minority of people with epilepsy with <i>SLC6A1</i> -related myoclonic-atonic seizures and developmental delay beginning before 3 years of age may enter remission but many experience relapse and the majority continue to require antiepileptic drugs in adolescence (Carvill <i>et al.</i> , 2015c; Johannesen <i>et al.</i> , 2018a).                                                                                                                                                                                                                                                                                    | 1-1 |
| Epilepsy with myoclonic-atonic seizures<br><i>STX1B</i>                           | 1 | 1 | Normal         | Familial <i>STX1B</i> -associated epilepsies including febrile seizures appear to have good prognoses with seizures remitting or responding to treatment in most people with normal intellectual development (Wolking <i>et al.</i> , 2019).                                                                                                                                                                                                                                                                                                                                                                                               | 0-1 |
| Ohtahara syndrome<br><i>KCNT1</i>                                                 | 1 | 1 | Profound delay | Early-onset <i>KCNT1</i> -related epileptic encephalopathies are associated with treatment-resistant epilepsy and limited neurodevelopment (Ohba <i>et al.</i> , 2015; McTague <i>et al.</i> , 2018). Their long-term outcomes and mortality have not been reported (Gertler <i>et al.</i> , 2018) but the epilepsy may progress to other epileptic encephalopathies such as Lennox-Gastaut syndrome which require follow up.                                                                                                                                                                                                              | 1-1 |
| Progressive myoclonus epilepsy<br><i>POLG</i><br>(compound heterozygous)          | 1 | 1 | Profound delay | Survival into adulthood following infant-onset bi-allelic <i>POLG</i> -related myoclonic epilepsy with status epilepticus and profound developmental delay is very rare at present (Wolf <i>et al.</i> , 2009; Lamperti and Zeviani, 2016).                                                                                                                                                                                                                                                                                                                                                                                                | 0-1 |
| Rett syndrome<br><i>MECP2</i>                                                     | 1 | 0 | Severe delay   | In epilepsy associated with <i>MECP2</i> -positive Rett syndrome seizures become less frequent in adulthood but often remains active or requires antiepileptic medication (Steffenburg <i>et al.</i> , 2001) and neurological follow up is often needed to differentiate stereotypies from seizures (Glaze <i>et al.</i> , 2010).                                                                                                                                                                                                                                                                                                          | 0-1 |
| Unclassified epilepsy<br><i>COL4A1</i>                                            | 1 | 1 | Profound delay | <i>COL4A1</i> variants are associated with developmental structural abnormalities of the brain with most patients requiring continuing antiepileptic medication and treatment resistance is common (Zagaglia <i>et al.</i> , 2018).                                                                                                                                                                                                                                                                                                                                                                                                        | 0-1 |
| Unclassified epilepsy<br><i>PCDH19</i>                                            | 1 | 1 | Normal         | <i>PCDH19</i> -related seizures become less frequent at puberty as behavioural and psychiatric features become more prominent (Trivisano <i>et al.</i> , 2018). Beyond 15 years old 80% may be seizure-free for two years but relapse after long seizure-free intervals is reported (van Harssel <i>et al.</i> , 2013) and many patients require follow up into adulthood because of seizures, continuing anti-epileptic medication and suspected seizures.                                                                                                                                                                                | 0-1 |
| Unclassified epilepsy<br><i>PRRT2</i>                                             | 1 | 0 | Normal         | This individual presented with a febrile focal seizure aged 6 months and presumably had an afebrile seizure to result in a diagnosis of unclassified epilepsy without developmental delay and not requiring antiepileptic medication within the trial (before 4 years of age). Febrile seizures have been reported in patients with <i>PRRT2</i> variants but their detection may be due to coincidence rather than true association (Ebrahimi-Fakhari <i>et al.</i> , 2015) thus it is possible that this individual has had both self-limited infantile epilepsy and a coincidental febrile seizure, and therefore has a good prognosis. | 0-1 |

|                                                     |    |    |                                                                                                                    |                                                                                                                                                                                                                                                                                                                                                                                                                                                                                                                                                                                                                                                                 |                   |
|-----------------------------------------------------|----|----|--------------------------------------------------------------------------------------------------------------------|-----------------------------------------------------------------------------------------------------------------------------------------------------------------------------------------------------------------------------------------------------------------------------------------------------------------------------------------------------------------------------------------------------------------------------------------------------------------------------------------------------------------------------------------------------------------------------------------------------------------------------------------------------------------|-------------------|
| Unclassified focal epilepsy<br><i>KCNA2</i>         | 1  | 0  | Normal                                                                                                             | <i>KCNA2</i> is associated with great neurological phenotypic heterogeneity and whilst seizures may respond well to treatment carriers often develop movement disorders that may require neurological follow up (Corbett <i>et al.</i> , 2016).                                                                                                                                                                                                                                                                                                                                                                                                                 | 0-1               |
| Unclassified focal epilepsy<br><i>KCNQ2</i>         | 1  | 1  | Mild delay                                                                                                         | Whilst the seizures of <i>KCNQ2</i> -related epilepsy usually remit in childhood even if encephalopathy continues, many continue antiepileptic medication (Weckhuysen <i>et al.</i> , 2013).                                                                                                                                                                                                                                                                                                                                                                                                                                                                    | 0-1               |
| Unclassified focal epilepsy<br><i>PRRT2</i>         | 1  | 0  | Severe delay                                                                                                       | Focal epilepsy beginning at 19 months with severe developmental delay is not part of the typical <i>PRRT2</i> phenotypic spectrum but the heterozygous c.649dup, p.Arg217Profs*8 variant has been reported in an individual with intellectual disability and focal seizures until sudden unexpected death in epilepsy in adolescence (Labate <i>et al.</i> , 2013). However, the relatively high frequency of this most common disease-causing <i>PRRT2</i> variant suggests that its detection in other seizure disorders may be coincidental to other genetic or environmental factors influencing seizure phenotype (Ebrahimi-Fakhari <i>et al.</i> , 2015). | 0-1               |
| Unclassified generalised epilepsy<br><i>CACNA1A</i> | 1  | 0  | Moderate delay                                                                                                     | <i>CACNA1A</i> variants have been associated with a range of neurological phenotypes including early-onset epileptic encephalopathies and genetic generalised epilepsies (Epi4K Consortium <i>et al.</i> , 2013; Epi4K Consortium, 2016) and whilst little is known of the long-term prognosis for epilepsy with generalised myoclonic seizures, people with disease-causing variants remain at risk of migraine, ataxia and seizures into adulthood (Damaj <i>et al.</i> , 2015).                                                                                                                                                                              | 0-1               |
| West syndrome<br><i>DEPDC5</i>                      | 1  | 1  | Severe delay                                                                                                       | <i>DEPDC5</i> -related epilepsies are usually active and require treatment into adulthood, although roughly half of those amenable to surgery may achieve remission (Baldassari <i>et al.</i> , 2019). In particular, West syndrome with seizures resistant to multiple antiepileptic drugs and ketogenic diet and multiple grey matter heterotopia associated with <i>DEPDC5</i> is likely to remain active (Carvill <i>et al.</i> , 2015b).                                                                                                                                                                                                                   | 1-1               |
| West syndrome<br><i>SCN2A</i>                       | 1  | 1  | Profound delay                                                                                                     | This child's afebrile focal seizures in the first week of life remained resistant to sodium valproate and evolved into West syndrome with profound developmental delay. Sixty per cent of people with <i>SCN2A</i> -related epileptic encephalopathies presenting before 3 months old obtain seizure-freedom, particularly if continuing sodium channel blocking medications; however, they may develop complex neurological disorders (Wolff <i>et al.</i> , 2017).                                                                                                                                                                                            | 1-1               |
| Total                                               | 76 | 36 | Profound delay = 9<br>Severe delay = 7<br>Moderate delay = 14<br>Mild delay = 8<br>Normal = 36<br>Missing data = 2 |                                                                                                                                                                                                                                                                                                                                                                                                                                                                                                                                                                                                                                                                 | 25-56<br>(33-74%) |

## Supplementary references

Akiyama M, Kobayashi K, Yoshinaga H, Ohtsuka Y. A long-term follow-up study of Dravet syndrome up to adulthood. *Epilepsia* 2010; 51: 1043-52.

Bahi-Buisson N, Kaminska A, Boddaert N, Rio M, Afenjar A, Gerard M, *et al.* The three stages of epilepsy in patients with *CDKL5* mutations. *Epilepsia* 2008; 49: 1027-37.

Baldassari S, Picard F, Verbeek NE, van Kempen M, Brilstra EH, Lesca G, *et al.* The landscape of epilepsy-related *GATOR1* variants. *Genet Med* 2019; 21: 398-408.

Caraballo RH, Fontana E, Darra F, Chacon S, Ross N, Fiorini E, *et al.* A study of 63 cases with eyelid myoclonia with or without absences: type of seizure or an epileptic syndrome? *Seizure* 2009; 18: 440-5.

Carvill G, Helbig I, Mefford H. *CHD2*-Related Neurodevelopmental Disorders. In: Adam MP, Ardinger HH, Pagon RA, Wallace SE, Bean LJH, Stephens K, *et al.*, editors. *GeneReviews*((R)). Seattle (WA): University of Washington, Seattle; 2015a.

Carvill GL, Crompton DE, Regan BM, McMahon JM, Saykally J, Zemel M, *et al.* Epileptic spasms are a feature of *DEPDC5* mTORopathy. *Neurol Genet* 2015b; 1: e17.

Carvill GL, McMahon JM, Schneider A, Zemel M, Myers CT, Saykally J, *et al.* Mutations in the GABA Transporter *SLC6A1* Cause Epilepsy with Myoclonic-Atonic Seizures. *Am J Hum Genet* 2015c; 96: 808-15.

Catarino CB, Liu JY, Liagkouras I, Gibbons VS, Labrum RW, Ellis R, *et al.* Dravet syndrome as epileptic encephalopathy: evidence from long-term course and neuropathology. *Brain* 2011; 134: 2982-3010.

Cooper MS, McIntosh A, Crompton DE, McMahon JM, Schneider A, Farrell K, *et al.* Mortality in Dravet syndrome. *Epilepsy Res* 2016; 128: 43-7.

Corbett MA, Bellows ST, Li M, Carroll R, Micallef S, Carvill GL, *et al.* Dominant KCNA2 mutation causes episodic ataxia and pharmacoresponsive epilepsy. *Neurology* 2016; 87: 1975-84.

Damaj L, Lupien-Meilleur A, Lortie A, Riou E, Ospina LH, Gagnon L, *et al.* CACNA1A haploinsufficiency causes cognitive impairment, autism and epileptic encephalopathy with mild cerebellar symptoms. *Eur J Hum Genet* 2015; 23: 1505-12.

de Lange IM, Gunning B, Sonsma ACM, van Gemert L, van Kempen M, Verbeek NE, *et al.* Outcomes and comorbidities of SCN1A-related seizure disorders. *Epilepsy Behav* 2019; 90: 252-9.

Ebrahimi-Fakhari D, Saffari A, Westenberger A, Klein C. The evolving spectrum of PRRT2-associated paroxysmal diseases. *Brain* 2015; 138: 3476-95.

Epi4K Consortium. De Novo Mutations in SLC1A2 and CACNA1A Are Important Causes of Epileptic Encephalopathies. *Am J Hum Genet* 2016; 99: 287-98.

Epi4K Consortium, Epilepsy Phenome/Genome Project, Allen AS, Berkovic SF, Cossette P, Delanty N, *et al.* De novo mutations in epileptic encephalopathies. *Nature* 2013; 501: 217-21.

Gardella E, Marini C, Trivisano M, Fitzgerald MP, Alber M, Howell KB, *et al.* The phenotype of SCN8A developmental and epileptic encephalopathy. *Neurology* 2018; 91: e1112-e24.

Genton P, Velizarova R, Dravet C. Dravet syndrome: the long-term outcome. *Epilepsia* 2011; 52 (Suppl 2): 44-9.

Gertler T, Bearden D, Bhattacharjee A, Carvill G. KCNT1-Related Epilepsy. In: Adam MP, Ardinger HH, Pagon RA, Wallace SE, Bean LJH, Stephens K, *et al.*, editors. *GeneReviews*((R)). Seattle (WA): University of Washington, Seattle; 2018.

Glaze DG, Percy AK, Skinner S, Motil KJ, Neul JL, Barrish JO, *et al.* Epilepsy and the natural history of Rett syndrome. *Neurology* 2010; 74: 909-12.

Grinton BE, Heron SE, Pelekanos JT, Zuberi SM, Kivity S, Afawi Z, *et al.* Familial neonatal seizures in 36 families: Clinical and genetic features correlate with outcome. *Epilepsia* 2015; 56: 1071-80.

Jansen FE, Sadleir LG, Harkin LA, Vadlamudi L, McMahon JM, Mulley JC, *et al.* Severe myoclonic epilepsy of infancy (Dravet syndrome): recognition and diagnosis in adults. *Neurology* 2006; 67: 2224-6.

Johannesen K, Marini C, Pfeffer S, Moller RS, Dorn T, Niturad CE, *et al.* Phenotypic spectrum of GABRA1: From generalized epilepsies to severe epileptic encephalopathies. *Neurology* 2016; 87: 1140-51.

Johannesen KM, Gardella E, Linnankivi T, Courage C, de Saint Martin A, Lehesjoki AE, *et al.* Defining the phenotypic spectrum of SLC6A1 mutations. *Epilepsia* 2018a; 59: 389-402.

Johannesen KM, Gardella E, Scheffer I, Howell K, Smith DM, Helbig I, *et al.* Early mortality in SCN8A-related epilepsies. *Epilepsy Res* 2018b; 143: 79-81.

Labate A, Tarantino P, Palamara G, Gagliardi M, Cavalcanti F, Ferlazzo E, *et al.* Mutations in PRRT2 result in familial infantile seizures with heterogeneous phenotypes including febrile convulsions and probable SUDEP. *Epilepsy Res* 2013; 104: 280-4.

Lamperti C, Zeviani M. Myoclonus epilepsy in mitochondrial disorders. *Epileptic Disord* 2016; 18: 94-102.

Larsen J, Carvill GL, Gardella E, Kluger G, Schmiedel G, Barisic N, *et al.* The phenotypic spectrum of SCN8A encephalopathy. *Neurology* 2015; 84: 480-9.

Leen WG, Taher M, Verbeek MM, Kamsteeg EJ, Van De Warrenburg BP, Willemsen MA. GLUT1 deficiency syndrome into adulthood: A follow-up study. *J Neurol* 2014; 261: 589-99.

Liang JS, Huang H, Wang JS, Lu JF. Phenotypic manifestations between male and female children with CDKL5 mutations. *Brain Dev* 2019; 41: 783-9.

McTague A, Appleton R, Avula S, Cross JH, King MD, Jacques TS, *et al.* Migrating partial seizures of infancy: expansion of the electroclinical, radiological and pathological disease spectrum. *Brain* 2013; 136: 1578-91.

McTague A, Howell KB, Cross JH, Kurian MA, Scheffer IE. The genetic landscape of the epileptic encephalopathies of infancy and childhood. *Lancet Neurol* 2016; 15: 304-16.

McTague A, Nair U, Malhotra S, Meyer E, Trump N, Gazina EV, *et al.* Clinical and molecular characterization of KCNT1-related severe early-onset epilepsy. *Neurology* 2018; 90: e55-e66.

Miceli F, Soldovieri MV, Joshi N, Weckhuysen S, Cooper E, Tagliatela M. KCNQ2-Related Disorders. In: Adam MP, Ardinger HH, Pagon RA, Wallace SE, Bean LJH, Stephens K, *et al.*, editors. *GeneReviews*((R)). Seattle (WA): University of Washington, Seattle; 2010.

Miceli F, Soldovieri MV, Joshi N, Weckhuysen S, Cooper EC, Tagliatela M. KCNQ3-Related Disorders. In: Adam MP, Ardinger HH, Pagon RA, Wallace SE, Bean LJH, Stephens K, *et al.*, editors. *GeneReviews*((R)). Seattle (WA): University of Washington, Seattle; 2014.

Muller A, Helbig I, Jansen C, Bast T, Guerrini R, Jahn J, *et al.* Retrospective evaluation of low long-term efficacy of antiepileptic drugs and ketogenic diet in 39 patients with CDKL5-related epilepsy. *Eur J Paediatr Neurol* 2016; 20: 147-51.

Ohba C, Kato M, Takahashi N, Osaka H, Shiihara T, Tohyama J, *et al.* De novo KCNT1 mutations in early-onset epileptic encephalopathy. *Epilepsia* 2015; 56: e121-8.

Stamberger H, Nikanorova M, Willemsen MH, Accorsi P, Angriman M, Baier H, *et al.* STXBPI encephalopathy: A neurodevelopmental disorder including epilepsy. *Neurology* 2016; 86: 954-62.

Steffenburg U, Hagberg G, Hagberg B. Epilepsy in a representative series of Rett syndrome. *Acta Paediatr* 2001; 90: 34-9.

Trivisano M, Pietrafusa N, Terracciano A, Marini C, Mei D, Darra F, *et al.* Defining the electroclinical phenotype and outcome of PCDH19-related epilepsy: A multicenter study. *Epilepsia* 2018; 59: 2260-71.

van Harssel JJ, Weckhuysen S, van Kempen MJ, Hardies K, Verbeek NE, de Kovel CG, *et al.* Clinical and genetic aspects of PCDH19-related epilepsy syndromes and the possible role of PCDH19 mutations in males with autism spectrum disorders. *Neurogenetics* 2013; 14: 23-34.

Weckhuysen S, Ivanovic V, Hendrickx R, Van Coster R, Hjalgrim H, Møller RS, *et al.* Extending the KCNQ2 encephalopathy spectrum: clinical and neuroimaging findings in 17 patients. *Neurology* 2013; 81: 1697-703.

Wolf NI, Rahman S, Schmitt B, Taanman JW, Duncan AJ, Harting I, *et al.* Status epilepticus in children with Alpers' disease caused by POLG1 mutations: EEG and MRI features. *Epilepsia* 2009; 50: 1596-607.

Wolff M, Johannesen KM, Hedrich UBS, Masnada S, Rubboli G, Gardella E, *et al.* Genetic and phenotypic heterogeneity suggest therapeutic implications in SCN2A-related disorders. *Brain* 2017; 140: 1316-36.

Wolking S, May P, Mei D, Moller RS, Balestrini S, Helbig KL, *et al.* Clinical spectrum of STX1B-related epileptic disorders. *Neurology* 2019; 92: e1238-e49.

Zagaglia S, Selch C, Nisevic JR, Mei D, Michalak Z, Hernandez-Hernandez L, *et al.* Neurologic phenotypes associated with COL4A1/2 mutations: Expanding the spectrum of disease. *Neurology* 2018; 91: e2078-e88.

Zhang YH, Burgess R, Malone JP, Glubb GC, Helbig KL, Vadlamudi L, *et al.* Genetic epilepsy with febrile seizures plus: Refining the spectrum. *Neurology* 2017; 89: 1210-9.
